# Supplementary material for: Metallo-dithiaporphyrin pigments for bulk-heterojunction solar cell applications: ab initio investigation of structural and optoelectronic properties
Source: Royal Society of Chemistry journal article supplement (doi:10.1039/d3ra05063g), 2023-01-01
Supplement: d3ra05063g1.pdf [file d3ra05063g1.pdf]

## Supplementary information

### Functional investigation

In order to select the most accurate functional for structure optimization and electronic properties calculation, we referred to the Koopmans approach<sup>46</sup>. This approach is based on the comparison of the computed electronic affinity and ionization potential to the HOMO and LUMO, analogs of IP and EA respectively according to equations 13 and 14<sup>47</sup>:

$$\varepsilon_{LUMO} = -EA \quad (1)$$

$$\varepsilon_{HOMO} = -IP \quad (2)$$

$$\Delta = |IP + E_{HOMO}| + |EA + E_{LUMO}| \quad (3)$$

The functional which has the minimal  $\Delta$  value (eq 15) is deemed the most appropriate for this type of calculations.

Table S1 Comparison of structural parameters calculated with different fonctionnal with DEF2-TZVP bases-set. Bond length in Angström and dihedral angle in degree.

| Ru(S <sub>2</sub> TTP) Cl <sub>2</sub> |        |        |        |          |        |                    |
|----------------------------------------|--------|--------|--------|----------|--------|--------------------|
| Bond                                   | B3LYP  | M05    | M05-2x | CAMB3LYP | WB97XD | experimental value |
| <b>Ru1—N1</b>                          | 2.088  | 2.092  | 2.092  | 2.080    | 2.077  | 2.082              |
| <b>Ru1—S1</b>                          | 2.254  | 2.250  | 2.258  | 2.246    | 2.250  | 2.251              |
| <b>Ru1—C11</b>                         | 2.458  | 2.449  | 2.454  | 2.438    | 2.439  | 2.399              |
| <b>S1—C4</b>                           | 1.746  | 1.733  | 1.734  | 1.731    | 1.731  | 1.750              |
| <b>S1—C1</b>                           | 1.746  | 1.733  | 1.734  | 1.731    | 1.731  | 1.755              |
| <b>N1—C6</b>                           | 1.385  | 1.378  | 1.368  | 1.375    | 1.375  | 1.393              |
| <b>Dihedral angle</b>                  | 12.374 | 11.951 | 12.206 | 12.143   | 12.123 | 12.700             |

Table S2 Comparison of structural parameters calculated at with B3LYP functional and different bases set bases-set / Bond length in Angström and dihedral angle in degree.

| Bond                  | 6-311LANL2DZ | 6-311LANL2TZ | DEF2TZP | experimental |
|-----------------------|--------------|--------------|---------|--------------|
| <b>Ru1—N1</b>         | 2,108        | 2,109        | 2,088   | 2.082        |
| <b>Ru1—S1</b>         | 2,293        | 2,293        | 2,251   | 2.251        |
| <b>Ru1—C11</b>        | 2,510        | 2,494        | 2,460   | 2.399        |
| <b>S1—C4</b>          | 1,766        | 1,766        | 1,750   | 1.750        |
| <b>S1—C1</b>          | 1.766        | 1,766        | 1,750   | 1.755        |
| <b>N1—C6</b>          | 1,385        | 1,386        | 1,385   | 1.393        |
| <b>Dihedral angle</b> | 12.492       | 12.046       | 12.374  | 12.700       |

Table S3 calculation of Electronic properties : Ionisation Potential (IP), Electronic Affinity (EA), HOMO energy, LUMO energy, Koopmans condition:  $\Delta = |IP + E_{HOMO}| + |EA + E_{LUMO}|$

| Functional       | IP(ev) | EA(ev) | $E_{HOMO}$ | $E_{LUMO}$ | IP+ $E_{HOMO}$ | EA+ $E_{LUMO}$ | $\Delta$ |
|------------------|--------|--------|------------|------------|----------------|----------------|----------|
| <b>B3LYP</b>     | 4,98   | 3,74   | -5,27      | -3,70      | -0,29          | 0,04           | 0,33     |
| <b>CAM-B3LYP</b> | 6,04   | 3,82   | -6,65      | -2,92      | -0,61          | 0,90           | 1,51     |
| <b>M05</b>       | 4,92   | 3,75   | -5,38      | -3,52      | -0,46          | 0,23           | 0,68     |
| <b>M052X</b>     | 5,99   | 4,00   | -6,75      | -3,26      | -0,76          | 0,74           | 1,51     |
| <b>WB97XD</b>    | 5,77   | 3,82   | -7,19      | -2,42      | -1,42          | 1,40           | 2,82     |

The B3LYP functional showed the lowest  $\Delta$  value. Consequently, all geometry optimizations and electronic property calculations were performed at B3LYP level.

Table S4 Comparison of structural parameters calculated with different bases set with B3LYP functional. Bond length in Angström, RMSD Calculation

| Bond                 | Bases set |          |              |              |
|----------------------|-----------|----------|--------------|--------------|
|                      | exp       | Def2tzvp | 6-311LANL2DZ | 6-311LANL2TZ |
| <b>C7-C8</b>         | 1,332     | 1,345    | 1,350        | 1,350        |
| <b>C2-C3</b>         | 1,371     | 1,395    | 1,398        | 1,398        |
| <b>N1-C9</b>         | 1,384     | 1,385    | 1,385        | 1,386        |
| <b>C1-C2</b>         | 1,388     | 1,400    | 1,402        | 1,402        |
| <b>C3-C4</b>         | 1,391     | 1,400    | 1,402        | 1,402        |
| <b>N1-C6</b>         | 1,393     | 1,385    | 1,385        | 1,386        |
| <b>C9-C10</b>        | 1,405     | 1,410    | 1,420        | 1,420        |
| <b>C1-C10i</b>       | 1,410     | 1,410    | 1,409        | 1,411        |
| <b>C5-C6</b>         | 1,410     | 1,420    | 1,419        | 1,419        |
| <b>C4-C5</b>         | 1,418     | 1,410    | 1,409        | 1,411        |
| <b>C6-C7</b>         | 1,442     | 1,451    | 1,454        | 1,454        |
| <b>C8-C9</b>         | 1,456     | 1,451    | 1,454        | 1,454        |
| <b>C5-C11</b>        | 1,493     | 1,490    | 1,491        | 1,491        |
| <b>S1-C4</b>         | 1,749     | 1,750    | 1,766        | 1,766        |
| <b>S1-C1</b>         | 1,754     | 1,750    | 1,766        | 1,766        |
| <b>Ru-N</b>          | 2,083     | 2,088    | 2,108        | 2,109        |
| <b>Ru-S</b>          | 2,251     | 2,250    | 2,293        | 2,293        |
| <b>Ru-Cl</b>         | 2,399     | 2,460    | 2,510        | 2,494        |
| <b>r<sup>2</sup></b> | -         | 0,999    | 0,999        | 0,999        |
| <b>RMSD</b>          | -         | 0,028    | 0,069        | 0,067        |

Table S5 Calculated angles for  $M(S_2TTP)Cl_2$  Bond angles and dihedral angle in degrees ( $^\circ$ )

| Bond angles      | Ru exp      | Ru sim  | Mn      | Fe II Q | Ni T    | Cu D    |
|------------------|-------------|---------|---------|---------|---------|---------|
| N(1)-Mt-N (2)    | 180         | 180     | 180     | 180     | 180     | 180     |
| S(1)-Mt- S(2)    | 180         | 180     | 180     | 180     | 180     | 180     |
| N(1)-Mt- Cl(1)   | 88.49 (9)   | 90.003  | 90.035  | 90.000  | 90.000  | 89.996  |
| N(1)-Mt- S(1A)   | 89.78 (9)   | 89.998  | 89.989  | 90.000  | 90.000  | 89.999  |
| C(4) - S(1)-C(1) | 91.8 (2)    | 93.431  | 93.339  | 93.247  | 93.120  | 92.778  |
| C(1)-S(1)-Mt     | 108.21 (14) | 108.927 | 102.276 | 104.400 | 106.610 | 104.714 |
| C(9)-N(1)-Mt     | 127.3 (3)   | 126.483 | 126.083 | 126.234 | 126.415 | 126.396 |
| S(1)-Mt-Cl(1)    | 89.25 (4)   | 92.332  | 94.280  | 93.753  | 93.449  | 94.031  |
| N(1)-Mt-S(1)     | 90.22 (9)   | 90.002  | 90.011  | 90.000  | 90.000  | 89.998  |
| C(4)-S(1)-Mt     | 108.07 (14) | 108.927 | 102.276 | 104.400 | 106.610 | 104.715 |
| C(9)-N(1)-C(6)   | 106.6 (3)   | 107.038 | 107.885 | 107.533 | 107.170 | 107.211 |
| C(6)-N(1)-Mt     | 125.9 (3)   | 126.479 | 126.032 | 126.234 | 126.415 | 126.393 |
| Dihedral angle   | 12.700      | 12.374  | 12.600  | 11.32   | 11.907  | 11.766  |

Scheme 1 Natural transition orbital analyses of the representative excited states HOMO, LUMO, HOMO-1 and LUMO+1 corresponding to transition with highest oscillator strength for  $M(S_2TTP) Cl_2$  Isovalue: 0.04 u.a.(Green: Positive value/Red: Negative value).

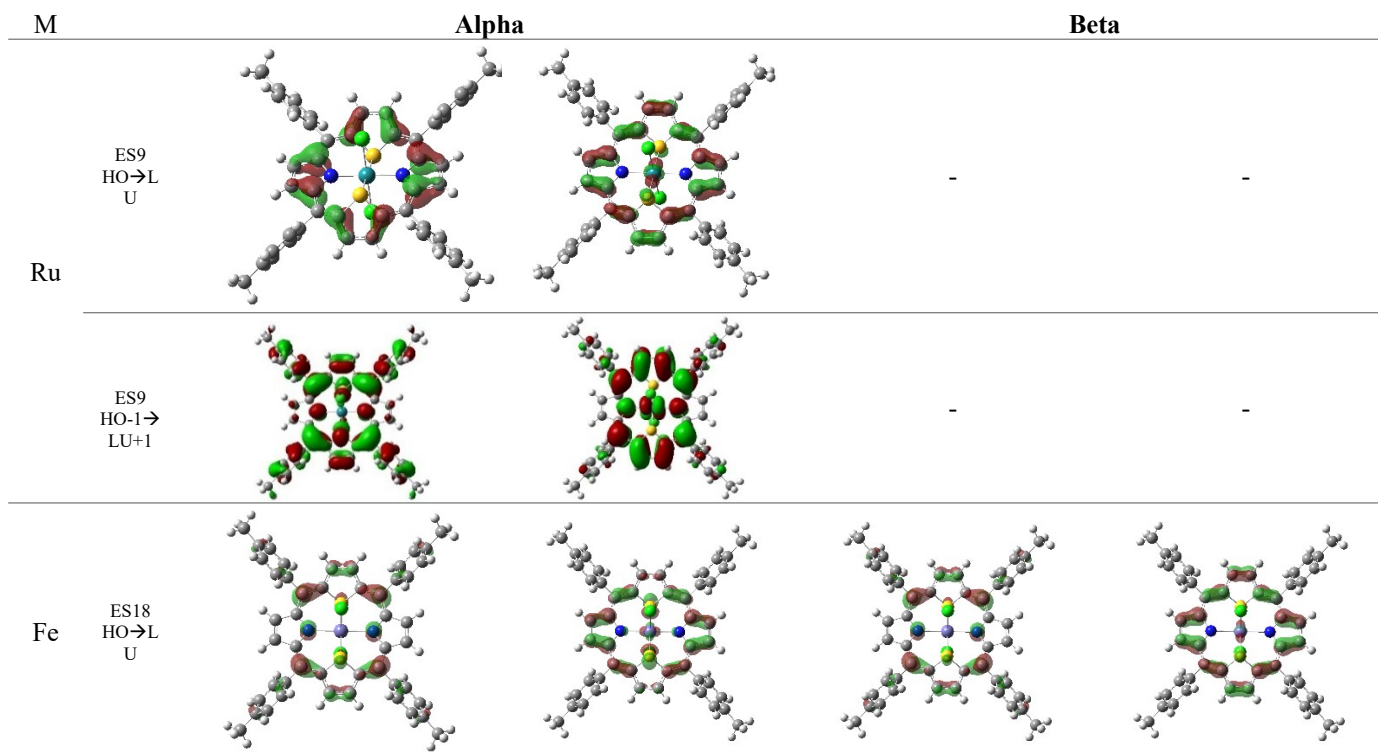

---

ES18  
HO-  
1→LU+  
1

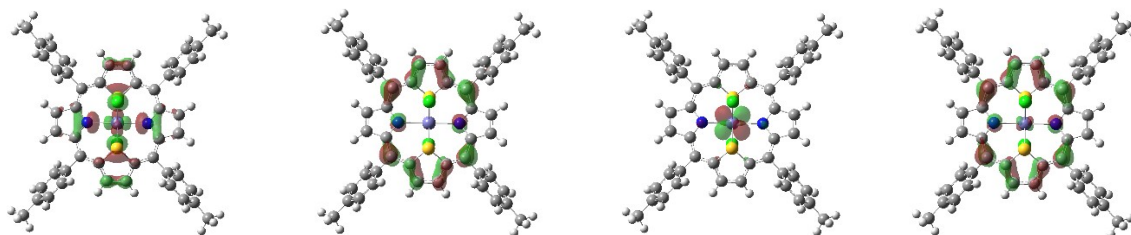

---

ES22  
HO→L  
U

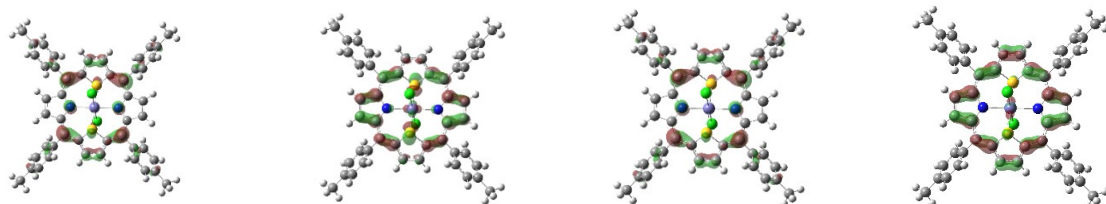

---

ES22  
HO-  
1→LU+  
1

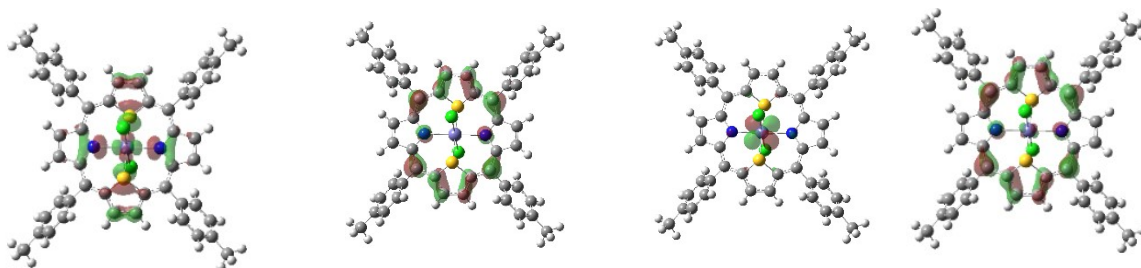

---

ES24  
HO→L  
U

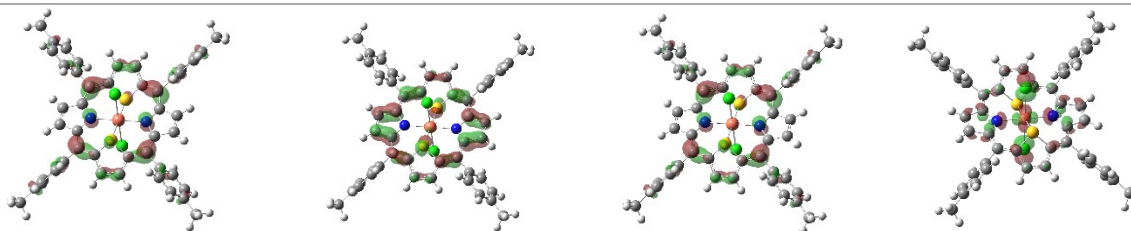

---

ES24H  
O-1→  
LU+1

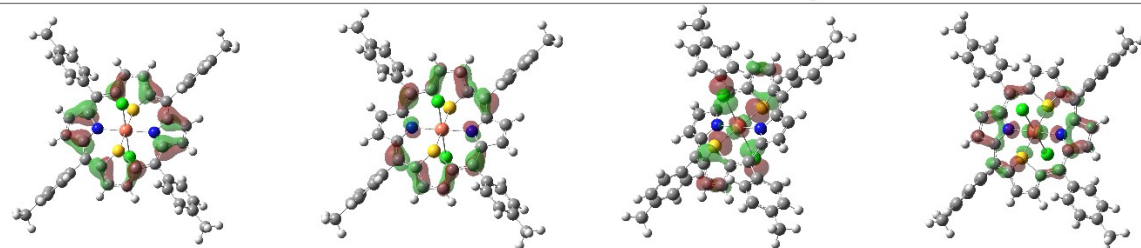

Cu

---

ES27  
HO→L  
U

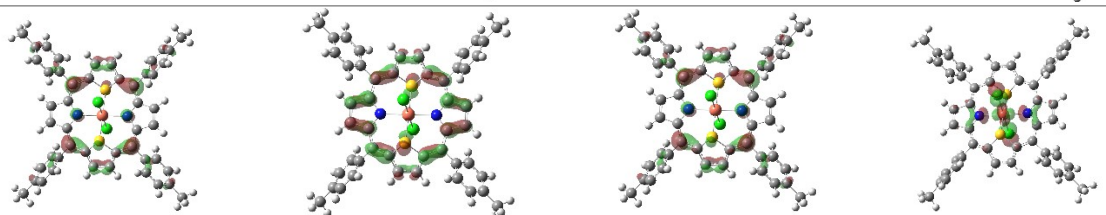

---

ES27  
HO-1→  
LU+1

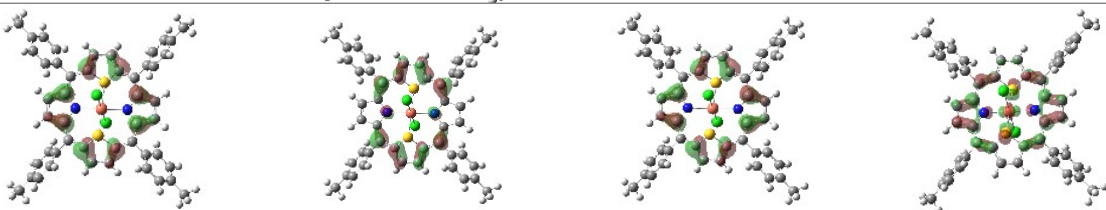

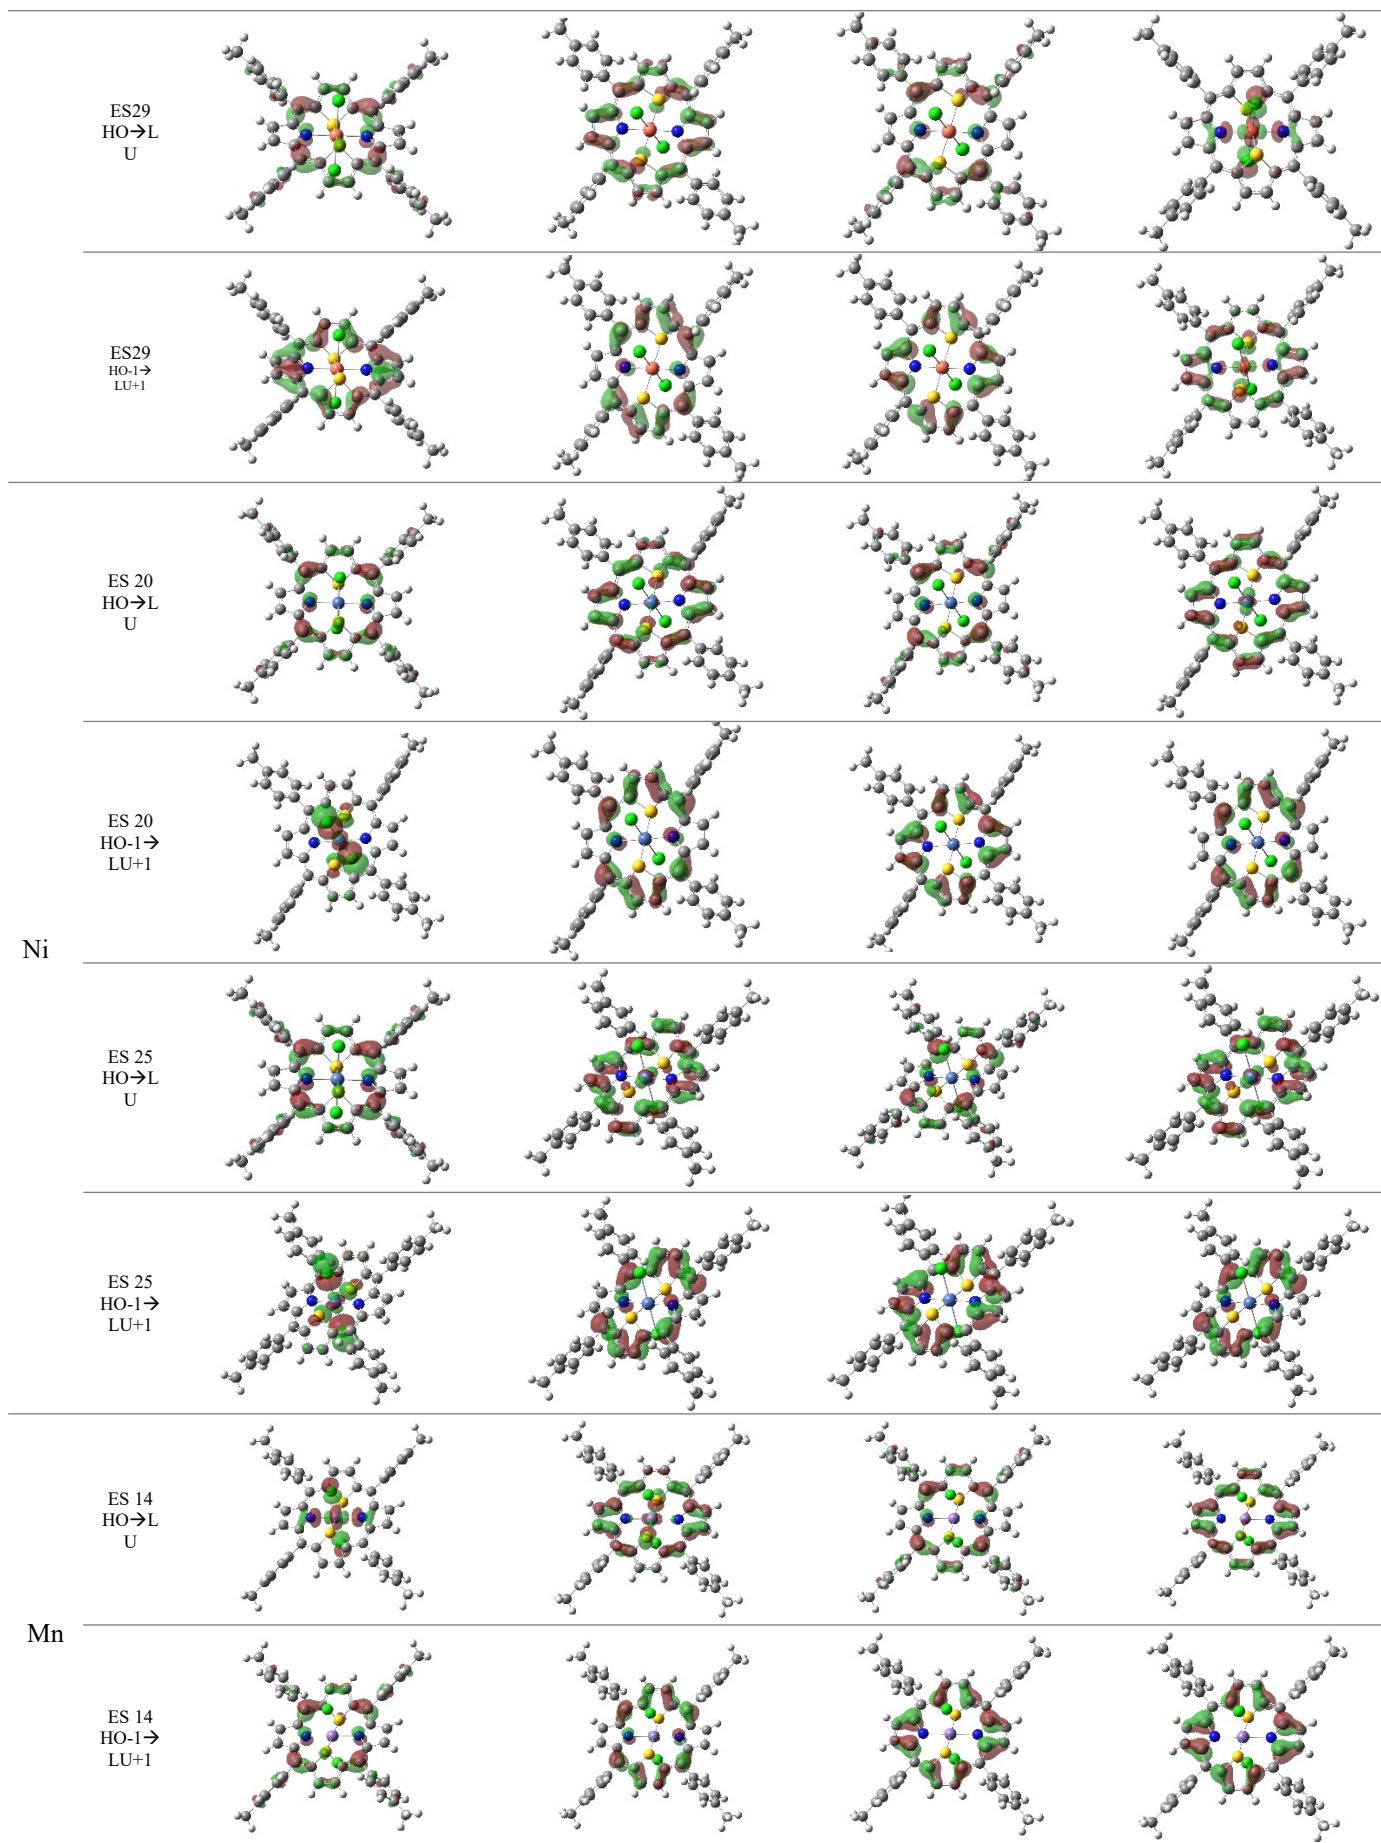



ES 20  
HO→L  
U

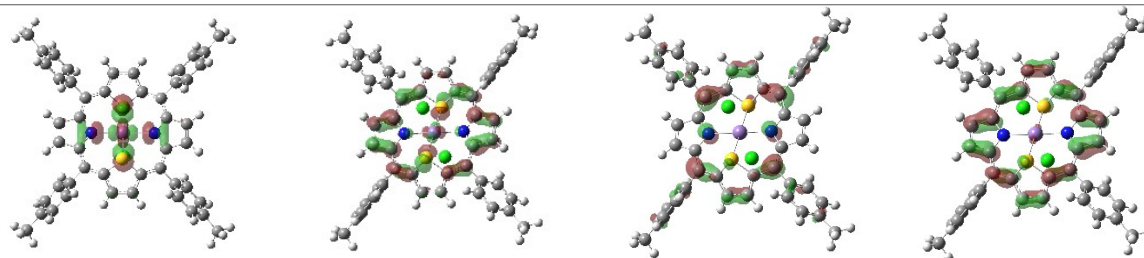

ES 20  
HO-1→  
LU+1

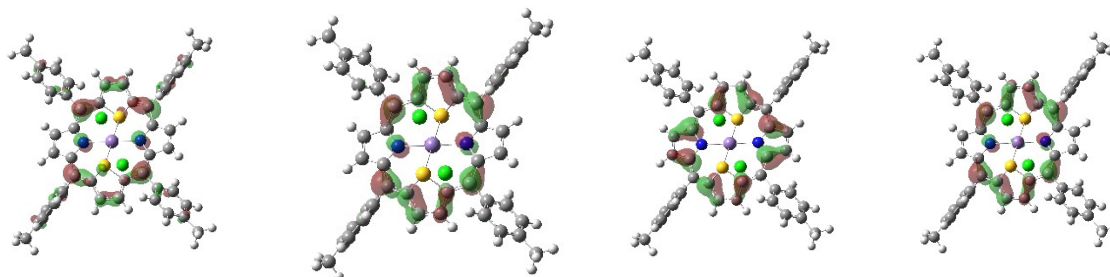

## Cartesian Coordinates of Optimized structures (Å)

### Optimized structure of Ru-Dithiaporphyrin Complex

|    |              |              |              |
|----|--------------|--------------|--------------|
| 6  | 0.327653000  | 2.462539000  | 2.566879000  |
| 6  | 0.167752000  | 1.099922000  | 2.913982000  |
| 6  | 0.561182000  | 2.946451000  | 1.265696000  |
| 7  | 0.000000000  | 0.000000000  | 2.088464000  |
| 6  | 0.099328000  | 0.665476000  | 4.297071000  |
| 16 | 1.184534000  | 1.918166000  | 0.000000000  |
| 6  | 0.241321000  | 4.185651000  | 0.697409000  |
| 44 | 0.000000000  | 0.000000000  | 0.000000000  |
| 6  | -0.167752000 | -1.099922000 | 2.913982000  |
| 6  | -0.099328000 | -0.665476000 | 4.297071000  |
| 1  | 0.207498000  | 1.308927000  | 5.152247000  |
| 6  | 0.561182000  | 2.946451000  | -1.265696000 |
| 1  | -0.101911000 | 5.025296000  | 1.283583000  |
| 6  | 0.241321000  | 4.185651000  | -0.697409000 |

|    |              |              |              |
|----|--------------|--------------|--------------|
| 7  | 0.000000000  | 0.000000000  | -2.088464000 |
| 16 | -1.184534000 | -1.918166000 | 0.000000000  |
| 17 | 2.147662000  | -1.196399000 | 0.000000000  |
| 6  | -0.327653000 | -2.462539000 | 2.566879000  |
| 6  | -0.167752000 | -1.099922000 | -2.913982000 |
| 6  | -0.561182000 | -2.946451000 | 1.265696000  |
| 17 | -2.147662000 | 1.196399000  | 0.000000000  |
| 6  | 0.167752000  | 1.099922000  | -2.913982000 |
| 6  | 0.099328000  | 0.665476000  | -4.297071000 |
| 6  | 0.327653000  | 2.462539000  | -2.566879000 |
| 1  | 0.207498000  | 1.308927000  | -5.152247000 |
| 6  | -0.099328000 | -0.665476000 | -4.297071000 |
| 6  | -0.327653000 | -2.462539000 | -2.566879000 |
| 6  | -0.241321000 | -4.185651000 | 0.697409000  |
| 6  | -0.241321000 | -4.185651000 | -0.697409000 |
| 1  | 0.101911000  | -5.025296000 | 1.283583000  |
| 6  | -0.561182000 | -2.946451000 | -1.265696000 |
| 1  | 0.101911000  | -5.025296000 | -1.283583000 |
| 1  | -0.207498000 | -1.308927000 | -5.152247000 |
| 1  | -0.207498000 | -1.308927000 | 5.152247000  |
| 1  | -0.101911000 | 5.025296000  | -1.283583000 |
| 6  | -0.142755000 | -3.495239000 | -3.623480000 |
| 6  | -1.143771000 | -4.438218000 | -3.876892000 |
| 6  | 1.042315000  | -3.577892000 | -4.362543000 |
| 6  | -0.971687000 | -5.415296000 | -4.848170000 |
| 1  | -2.072617000 | -4.392816000 | -3.322281000 |
| 6  | 1.212948000  | -4.564707000 | -5.323019000 |
| 1  | 1.840802000  | -2.872412000 | -4.172105000 |
| 6  | 0.210234000  | -5.500983000 | -5.586623000 |
| 1  | -1.771830000 | -6.121286000 | -5.036979000 |

|   |              |              |              |
|---|--------------|--------------|--------------|
| 1 | 2.143889000  | -4.609626000 | -5.875982000 |
| 6 | -0.142755000 | -3.495239000 | 3.623480000  |
| 6 | -1.143771000 | -4.438218000 | 3.876892000  |
| 6 | 1.042315000  | -3.577892000 | 4.362543000  |
| 6 | -0.971687000 | -5.415296000 | 4.848170000  |
| 1 | -2.072617000 | -4.392816000 | 3.322281000  |
| 6 | 1.212948000  | -4.564707000 | 5.323019000  |
| 1 | 1.840802000  | -2.872412000 | 4.172105000  |
| 6 | 0.210234000  | -5.500983000 | 5.586623000  |
| 1 | -1.771830000 | -6.121286000 | 5.036979000  |
| 1 | 2.143889000  | -4.609626000 | 5.875982000  |
| 6 | 0.142755000  | 3.495239000  | 3.623480000  |
| 6 | 1.143771000  | 4.438218000  | 3.876892000  |
| 6 | -1.042315000 | 3.577892000  | 4.362543000  |
| 6 | 0.971687000  | 5.415296000  | 4.848170000  |
| 1 | 2.072617000  | 4.392816000  | 3.322281000  |
| 6 | -1.212948000 | 4.564707000  | 5.323019000  |
| 1 | -1.840802000 | 2.872412000  | 4.172105000  |
| 6 | -0.210234000 | 5.500983000  | 5.586623000  |
| 1 | 1.771830000  | 6.121286000  | 5.036979000  |
| 1 | -2.143889000 | 4.609626000  | 5.875982000  |
| 6 | 0.142755000  | 3.495239000  | -3.623480000 |
| 6 | 1.143771000  | 4.438218000  | -3.876892000 |
| 6 | -1.042315000 | 3.577892000  | -4.362543000 |
| 6 | 0.971687000  | 5.415296000  | -4.848170000 |
| 1 | 2.072617000  | 4.392816000  | -3.322281000 |
| 6 | -1.212948000 | 4.564707000  | -5.323019000 |
| 1 | -1.840802000 | 2.872412000  | -4.172105000 |
| 6 | -0.210234000 | 5.500983000  | -5.586623000 |
| 1 | 1.771830000  | 6.121286000  | -5.036979000 |



|   |              |              |              |
|---|--------------|--------------|--------------|
| 1 | -2.143889000 | 4.609626000  | -5.875982000 |
| 6 | 0.410502000  | -6.583608000 | -6.612507000 |
| 1 | 0.909058000  | -7.450559000 | -6.169155000 |
| 1 | -0.541255000 | -6.926958000 | -7.018827000 |
| 1 | 1.034226000  | -6.238318000 | -7.437950000 |
| 6 | 0.410502000  | -6.583608000 | 6.612507000  |
| 1 | -0.541255000 | -6.926958000 | 7.018827000  |
| 1 | 0.909058000  | -7.450559000 | 6.169155000  |
| 1 | 1.034226000  | -6.238318000 | 7.437950000  |
| 6 | -0.410502000 | 6.583608000  | 6.612507000  |
| 1 | 0.541255000  | 6.926958000  | 7.018827000  |
| 1 | -0.909058000 | 7.450559000  | 6.169155000  |
| 1 | -1.034226000 | 6.238318000  | 7.437950000  |
| 6 | -0.410502000 | 6.583608000  | -6.612507000 |
| 1 | -0.909058000 | 7.450559000  | -6.169155000 |
| 1 | 0.541255000  | 6.926958000  | -7.018827000 |
| 1 | -1.034226000 | 6.238318000  | -7.437950000 |

### **Optimized structure of Fe-Dithiaporphyrin Complex**

|    |              |              |              |
|----|--------------|--------------|--------------|
| 6  | 0.338933000  | 2.455757000  | 2.552742000  |
| 6  | 0.163222000  | 1.089962000  | 2.894968000  |
| 6  | 0.593255000  | 2.918932000  | 1.258833000  |
| 7  | 0.000000000  | 0.000000000  | 2.066185000  |
| 6  | 0.095279000  | 0.666868000  | 4.278049000  |
| 16 | 1.166727000  | 1.857853000  | 0.000000000  |
| 6  | 0.322694000  | 4.177238000  | 0.692827000  |
| 6  | -0.163222000 | -1.089962000 | 2.894968000  |
| 6  | -0.095279000 | -0.666868000 | 4.278049000  |
| 1  | 0.202443000  | 1.313637000  | 5.130766000  |
| 6  | 0.593255000  | 2.918932000  | -1.258833000 |

|    |              |              |              |
|----|--------------|--------------|--------------|
| 1  | 0.020145000  | 5.027931000  | 1.284654000  |
| 6  | 0.322694000  | 4.177238000  | -0.692827000 |
| 7  | 0.000000000  | 0.000000000  | -2.066185000 |
| 16 | -1.166727000 | -1.857853000 | 0.000000000  |
| 17 | 2.093215000  | -1.190896000 | 0.000000000  |
| 6  | -0.338933000 | -2.455757000 | 2.552742000  |
| 6  | -0.163222000 | -1.089962000 | -2.894968000 |
| 6  | -0.593255000 | -2.918932000 | 1.258833000  |
| 17 | -2.093215000 | 1.190896000  | 0.000000000  |
| 6  | 0.163222000  | 1.089962000  | -2.894968000 |
| 6  | 0.095279000  | 0.666868000  | -4.278049000 |
| 6  | 0.338933000  | 2.455757000  | -2.552742000 |
| 1  | 0.202443000  | 1.313637000  | -5.130766000 |
| 6  | -0.095279000 | -0.666868000 | -4.278049000 |
| 6  | -0.338933000 | -2.455757000 | -2.552742000 |
| 6  | -0.322694000 | -4.177238000 | 0.692827000  |
| 6  | -0.322694000 | -4.177238000 | -0.692827000 |
| 1  | -0.020145000 | -5.027931000 | 1.284654000  |
| 6  | -0.593255000 | -2.918932000 | -1.258833000 |
| 1  | -0.020145000 | -5.027931000 | -1.284654000 |
| 1  | -0.202443000 | -1.313637000 | -5.130766000 |
| 1  | -0.202443000 | -1.313637000 | 5.130766000  |
| 1  | 0.020145000  | 5.027931000  | -1.284654000 |
| 6  | -0.145397000 | -3.489923000 | -3.604707000 |
| 6  | -1.149496000 | -4.424670000 | -3.875490000 |
| 6  | 1.051247000  | -3.579842000 | -4.324121000 |
| 6  | -0.968031000 | -5.402497000 | -4.844275000 |
| 1  | -2.087784000 | -4.371475000 | -3.337746000 |
| 6  | 1.230668000  | -4.567571000 | -5.281854000 |
| 1  | 1.851310000  | -2.880042000 | -4.119943000 |

|   |              |              |              |
|---|--------------|--------------|--------------|
| 6 | 0.225666000  | -5.496509000 | -5.562497000 |
| 1 | -1.770190000 | -6.102136000 | -5.047419000 |
| 1 | 2.170133000  | -4.618784000 | -5.819572000 |
| 6 | -0.145397000 | -3.489923000 | 3.604707000  |
| 6 | -1.149496000 | -4.424670000 | 3.875490000  |
| 6 | 1.051247000  | -3.579842000 | 4.324121000  |
| 6 | -0.968031000 | -5.402497000 | 4.844275000  |
| 1 | -2.087784000 | -4.371475000 | 3.337746000  |
| 6 | 1.230668000  | -4.567571000 | 5.281854000  |
| 1 | 1.851310000  | -2.880042000 | 4.119943000  |
| 6 | 0.225666000  | -5.496509000 | 5.562497000  |
| 1 | -1.770190000 | -6.102136000 | 5.047419000  |
| 1 | 2.170133000  | -4.618784000 | 5.819572000  |
| 6 | 0.145397000  | 3.489923000  | 3.604707000  |
| 6 | 1.149496000  | 4.424670000  | 3.875490000  |
| 6 | -1.051247000 | 3.579842000  | 4.324121000  |
| 6 | 0.968031000  | 5.402497000  | 4.844275000  |
| 1 | 2.087784000  | 4.371475000  | 3.337746000  |
| 6 | -1.230668000 | 4.567571000  | 5.281854000  |
| 1 | -1.851310000 | 2.880042000  | 4.119943000  |
| 6 | -0.225666000 | 5.496509000  | 5.562497000  |
| 1 | 1.770190000  | 6.102136000  | 5.047419000  |
| 1 | -2.170133000 | 4.618784000  | 5.819572000  |
| 6 | 0.145397000  | 3.489923000  | -3.604707000 |
| 6 | 1.149496000  | 4.424670000  | -3.875490000 |
| 6 | -1.051247000 | 3.579842000  | -4.324121000 |
| 6 | 0.968031000  | 5.402497000  | -4.844275000 |
| 1 | 2.087784000  | 4.371475000  | -3.337746000 |
| 6 | -1.230668000 | 4.567571000  | -5.281854000 |
| 1 | -1.851310000 | 2.880042000  | -4.119943000 |

|    |              |              |              |
|----|--------------|--------------|--------------|
| 6  | -0.225666000 | 5.496509000  | -5.562497000 |
| 1  | 1.770190000  | 6.102136000  | -5.047419000 |
| 1  | -2.170133000 | 4.618784000  | -5.819572000 |
| 6  | 0.435225000  | -6.579907000 | -6.585608000 |
| 1  | 0.920420000  | -7.450381000 | -6.134417000 |
| 1  | -0.512051000 | -6.916494000 | -7.007693000 |
| 1  | 1.074924000  | -6.238564000 | -7.400378000 |
| 6  | 0.435225000  | -6.579907000 | 6.585608000  |
| 1  | -0.512051000 | -6.916494000 | 7.007693000  |
| 1  | 0.920420000  | -7.450381000 | 6.134417000  |
| 1  | 1.074924000  | -6.238564000 | 7.400378000  |
| 6  | -0.435225000 | 6.579907000  | 6.585608000  |
| 1  | 0.512051000  | 6.916494000  | 7.007693000  |
| 1  | -0.920420000 | 7.450381000  | 6.134417000  |
| 1  | -1.074924000 | 6.238564000  | 7.400378000  |
| 6  | -0.435225000 | 6.579907000  | -6.585608000 |
| 1  | -0.920420000 | 7.450381000  | -6.134417000 |
| 1  | 0.512051000  | 6.916494000  | -7.007693000 |
| 1  | -1.074924000 | 6.238564000  | -7.400378000 |
| 26 | 0.000000000  | 0.000000000  | 0.000000000  |

### **Optimized structure of Ni-Dithiaporphyrin Complex**

|    |              |              |             |
|----|--------------|--------------|-------------|
| 6  | 0.364902000  | 2.450890000  | 2.563379000 |
| 6  | 0.180386000  | 1.087832000  | 2.929816000 |
| 6  | 0.611783000  | 2.911243000  | 1.263406000 |
| 7  | 0.000000000  | 0.000000000  | 2.113677000 |
| 6  | 0.105275000  | 0.667320000  | 4.312902000 |
| 16 | 1.264686000  | 1.898715000  | 0.000000000 |
| 6  | 0.242209000  | 4.146488000  | 0.690250000 |
| 6  | -0.180386000 | -1.087832000 | 2.929816000 |

|    |              |              |              |
|----|--------------|--------------|--------------|
| 6  | -0.105275000 | -0.667320000 | 4.312902000  |
| 1  | 0.226168000  | 1.309511000  | 5.167557000  |
| 6  | 0.611783000  | 2.911243000  | -1.263406000 |
| 1  | -0.141859000 | 4.963374000  | 1.281990000  |
| 6  | 0.242209000  | 4.146488000  | -0.690250000 |
| 7  | 0.000000000  | 0.000000000  | -2.113677000 |
| 16 | -1.264686000 | -1.898715000 | 0.000000000  |
| 17 | 2.168884000  | -1.251583000 | 0.000000000  |
| 6  | -0.364902000 | -2.450890000 | 2.563379000  |
| 6  | -0.180386000 | -1.087832000 | -2.929816000 |
| 6  | -0.611783000 | -2.911243000 | 1.263406000  |
| 17 | -2.168884000 | 1.251583000  | 0.000000000  |
| 6  | 0.180386000  | 1.087832000  | -2.929816000 |
| 6  | 0.105275000  | 0.667320000  | -4.312902000 |
| 6  | 0.364902000  | 2.450890000  | -2.563379000 |
| 1  | 0.226168000  | 1.309511000  | -5.167557000 |
| 6  | -0.105275000 | -0.667320000 | -4.312902000 |
| 6  | -0.364902000 | -2.450890000 | -2.563379000 |
| 6  | -0.242209000 | -4.146488000 | 0.690250000  |
| 6  | -0.242209000 | -4.146488000 | -0.690250000 |
| 1  | 0.141859000  | -4.963374000 | 1.281990000  |
| 6  | -0.611783000 | -2.911243000 | -1.263406000 |
| 1  | 0.141859000  | -4.963374000 | -1.281990000 |
| 1  | -0.226168000 | -1.309511000 | -5.167557000 |
| 1  | -0.226168000 | -1.309511000 | 5.167557000  |
| 1  | -0.141859000 | 4.963374000  | -1.281990000 |
| 6  | -0.161298000 | -3.496309000 | -3.600781000 |
| 6  | -1.147857000 | -4.459304000 | -3.838229000 |
| 6  | 1.024162000  | -3.570040000 | -4.341164000 |
| 6  | -0.961673000 | -5.447052000 | -4.795394000 |

|   |              |              |              |
|---|--------------|--------------|--------------|
| 1 | -2.076900000 | -4.419269000 | -3.283712000 |
| 6 | 1.209025000  | -4.568532000 | -5.286295000 |
| 1 | 1.812417000  | -2.850711000 | -4.161188000 |
| 6 | 0.220700000  | -5.524415000 | -5.534308000 |
| 1 | -1.750830000 | -6.168018000 | -4.973114000 |
| 1 | 2.139936000  | -4.607450000 | -5.839623000 |
| 6 | -0.161298000 | -3.496309000 | 3.600781000  |
| 6 | -1.147857000 | -4.459304000 | 3.838229000  |
| 6 | 1.024162000  | -3.570040000 | 4.341164000  |
| 6 | -0.961673000 | -5.447052000 | 4.795394000  |
| 1 | -2.076900000 | -4.419269000 | 3.283712000  |
| 6 | 1.209025000  | -4.568532000 | 5.286295000  |
| 1 | 1.812417000  | -2.850711000 | 4.161188000  |
| 6 | 0.220700000  | -5.524415000 | 5.534308000  |
| 1 | -1.750830000 | -6.168018000 | 4.973114000  |
| 1 | 2.139936000  | -4.607450000 | 5.839623000  |
| 6 | 0.161298000  | 3.496309000  | 3.600781000  |
| 6 | 1.147857000  | 4.459304000  | 3.838229000  |
| 6 | -1.024162000 | 3.570040000  | 4.341164000  |
| 6 | 0.961673000  | 5.447052000  | 4.795394000  |
| 1 | 2.076900000  | 4.419269000  | 3.283712000  |
| 6 | -1.209025000 | 4.568532000  | 5.286295000  |
| 1 | -1.812417000 | 2.850711000  | 4.161188000  |
| 6 | -0.220700000 | 5.524415000  | 5.534308000  |
| 1 | 1.750830000  | 6.168018000  | 4.973114000  |
| 1 | -2.139936000 | 4.607450000  | 5.839623000  |
| 6 | 0.161298000  | 3.496309000  | -3.600781000 |
| 6 | 1.147857000  | 4.459304000  | -3.838229000 |
| 6 | -1.024162000 | 3.570040000  | -4.341164000 |
| 6 | 0.961673000  | 5.447052000  | -4.795394000 |

|    |              |              |              |
|----|--------------|--------------|--------------|
| 1  | 2.076900000  | 4.419269000  | -3.283712000 |
| 6  | -1.209025000 | 4.568532000  | -5.286295000 |
| 1  | -1.812417000 | 2.850711000  | -4.161188000 |
| 6  | -0.220700000 | 5.524415000  | -5.534308000 |
| 1  | 1.750830000  | 6.168018000  | -4.973114000 |
| 1  | -2.139936000 | 4.607450000  | -5.839623000 |
| 6  | 0.436700000  | -6.618319000 | -6.544553000 |
| 1  | 0.949348000  | -7.470473000 | -6.088749000 |
| 1  | -0.509971000 | -6.982622000 | -6.944329000 |
| 1  | 1.054233000  | -6.275438000 | -7.375580000 |
| 6  | 0.436700000  | -6.618319000 | 6.544553000  |
| 1  | -0.509971000 | -6.982622000 | 6.944329000  |
| 1  | 0.949348000  | -7.470473000 | 6.088749000  |
| 1  | 1.054233000  | -6.275438000 | 7.375580000  |
| 6  | -0.436700000 | 6.618319000  | 6.544553000  |
| 1  | 0.509971000  | 6.982622000  | 6.944329000  |
| 1  | -0.949348000 | 7.470473000  | 6.088749000  |
| 1  | -1.054233000 | 6.275438000  | 7.375580000  |
| 6  | -0.436700000 | 6.618319000  | -6.544553000 |
| 1  | -0.949348000 | 7.470473000  | -6.088749000 |
| 1  | 0.509971000  | 6.982622000  | -6.944329000 |
| 1  | -1.054233000 | 6.275438000  | -7.375580000 |
| 28 | 0.000000000  | 0.000000000  | 0.000000000  |

### **Optimized structure of Cu-Dithiaporphyrin Complex**

|   |             |             |             |
|---|-------------|-------------|-------------|
| 6 | 0.408540000 | 2.457676000 | 2.538572000 |
| 6 | 0.204770000 | 1.088907000 | 2.880706000 |
| 6 | 0.684473000 | 2.943968000 | 1.254627000 |
| 7 | 0.000000000 | 0.000000000 | 2.062832000 |
| 6 | 0.119183000 | 0.665361000 | 4.257702000 |



|    |              |              |              |
|----|--------------|--------------|--------------|
| 16 | 1.375398000  | 1.959747000  | 0.000000000  |
| 6  | 0.259682000  | 4.170948000  | 0.687404000  |
| 6  | -0.204770000 | -1.088907000 | 2.880706000  |
| 6  | -0.119183000 | -0.665361000 | 4.257702000  |
| 1  | 0.253563000  | 1.304039000  | 5.112713000  |
| 6  | 0.684473000  | 2.943968000  | -1.254627000 |
| 1  | -0.172633000 | 4.960159000  | 1.283169000  |
| 6  | 0.259682000  | 4.170948000  | -0.687404000 |
| 7  | 0.000000000  | 0.000000000  | -2.062832000 |
| 16 | -1.375398000 | -1.959747000 | 0.000000000  |
| 17 | 2.155790000  | -1.290822000 | 0.000000000  |
| 6  | -0.408540000 | -2.457676000 | 2.538572000  |
| 6  | -0.204770000 | -1.088907000 | -2.880706000 |
| 6  | -0.684473000 | -2.943968000 | 1.254627000  |
| 17 | -2.155790000 | 1.290822000  | 0.000000000  |
| 6  | 0.204770000  | 1.088907000  | -2.880706000 |
| 6  | 0.119183000  | 0.665361000  | -4.257702000 |
| 6  | 0.408540000  | 2.457676000  | -2.538572000 |
| 1  | 0.253563000  | 1.304039000  | -5.112713000 |
| 6  | -0.119183000 | -0.665361000 | -4.257702000 |
| 6  | -0.408540000 | -2.457676000 | -2.538572000 |
| 6  | -0.259682000 | -4.170948000 | 0.687404000  |
| 6  | -0.259682000 | -4.170948000 | -0.687404000 |
| 1  | 0.172633000  | -4.960159000 | 1.283169000  |
| 6  | -0.684473000 | -2.943968000 | -1.254627000 |
| 1  | 0.172633000  | -4.960159000 | -1.283169000 |
| 1  | -0.253563000 | -1.304039000 | -5.112713000 |

|   |              |              |              |
|---|--------------|--------------|--------------|
| 1 | -0.253563000 | -1.304039000 | 5.112713000  |
| 1 | -0.172633000 | 4.960159000  | -1.283169000 |
| 6 | -0.178961000 | -3.486307000 | -3.587146000 |
| 6 | -1.153936000 | -4.454609000 | -3.850361000 |
| 6 | 1.019700000  | -3.544917000 | -4.307807000 |
| 6 | -0.944597000 | -5.431540000 | -4.813747000 |
| 1 | -2.092076000 | -4.426685000 | -3.310633000 |
| 6 | 1.227886000  | -4.532898000 | -5.258884000 |
| 1 | 1.799929000  | -2.822396000 | -4.107080000 |
| 6 | 0.250698000  | -5.493229000 | -5.533104000 |
| 1 | -1.725250000 | -6.156465000 | -5.011720000 |
| 1 | 2.168583000  | -4.560409000 | -5.796119000 |
| 6 | -0.178961000 | -3.486307000 | 3.587146000  |
| 6 | -1.153936000 | -4.454609000 | 3.850361000  |
| 6 | 1.019700000  | -3.544917000 | 4.307807000  |
| 6 | -0.944597000 | -5.431540000 | 4.813747000  |
| 1 | -2.092076000 | -4.426685000 | 3.310633000  |
| 6 | 1.227886000  | -4.532898000 | 5.258884000  |
| 1 | 1.799929000  | -2.822396000 | 4.107080000  |
| 6 | 0.250698000  | -5.493229000 | 5.533104000  |
| 1 | -1.725250000 | -6.156465000 | 5.011720000  |
| 1 | 2.168583000  | -4.560409000 | 5.796119000  |
| 6 | 0.178961000  | 3.486307000  | 3.587146000  |
| 6 | 1.153936000  | 4.454609000  | 3.850361000  |
| 6 | -1.019700000 | 3.544917000  | 4.307807000  |
| 6 | 0.944597000  | 5.431540000  | 4.813747000  |
| 1 | 2.092076000  | 4.426685000  | 3.310633000  |

|   |              |              |              |
|---|--------------|--------------|--------------|
| 6 | -1.227886000 | 4.532898000  | 5.258884000  |
| 1 | -1.799929000 | 2.822396000  | 4.107080000  |
| 6 | -0.250698000 | 5.493229000  | 5.533104000  |
| 1 | 1.725250000  | 6.156465000  | 5.011720000  |
| 1 | -2.168583000 | 4.560409000  | 5.796119000  |
| 6 | 0.178961000  | 3.486307000  | -3.587146000 |
| 6 | 1.153936000  | 4.454609000  | -3.850361000 |
| 6 | -1.019700000 | 3.544917000  | -4.307807000 |
| 6 | 0.944597000  | 5.431540000  | -4.813747000 |
| 1 | 2.092076000  | 4.426685000  | -3.310633000 |
| 6 | -1.227886000 | 4.532898000  | -5.258884000 |
| 1 | -1.799929000 | 2.822396000  | -4.107080000 |
| 6 | -0.250698000 | 5.493229000  | -5.533104000 |
| 1 | 1.725250000  | 6.156465000  | -5.011720000 |
| 1 | -2.168583000 | 4.560409000  | -5.796119000 |
| 6 | 0.491987000  | -6.575625000 | -6.549925000 |
| 1 | 1.004676000  | -7.427658000 | -6.093920000 |
| 1 | -0.445064000 | -6.944129000 | -6.968079000 |
| 1 | 1.119710000  | -6.219745000 | -7.367757000 |
| 6 | 0.491987000  | -6.575625000 | 6.549925000  |
| 1 | -0.445064000 | -6.944129000 | 6.968079000  |
| 1 | 1.004676000  | -7.427658000 | 6.093920000  |
| 1 | 1.119710000  | -6.219745000 | 7.367757000  |
| 6 | -0.491987000 | 6.575625000  | 6.549925000  |
| 1 | 0.445064000  | 6.944129000  | 6.968079000  |
| 1 | -1.004676000 | 7.427658000  | 6.093920000  |
| 1 | -1.119710000 | 6.219745000  | 7.367757000  |

|    |              |             |              |
|----|--------------|-------------|--------------|
| 6  | -0.491987000 | 6.575625000 | -6.549925000 |
| 1  | -1.004676000 | 7.427658000 | -6.093920000 |
| 1  | 0.445064000  | 6.944129000 | -6.968079000 |
| 1  | -1.119710000 | 6.219745000 | -7.367757000 |
| 29 | 0.000000000  | 0.000000000 | 0.000000000  |

### **Optimized structure of Mn-Dithiaporphyrin Complex**

|    |              |              |              |
|----|--------------|--------------|--------------|
| 6  | 0.393238000  | 2.450236000  | 2.574361000  |
| 6  | 0.199870000  | 1.088949000  | 2.962150000  |
| 6  | 0.640058000  | 2.918722000  | 1.270682000  |
| 7  | 0.000000000  | 0.000000000  | 2.153627000  |
| 6  | 0.117196000  | 0.667371000  | 4.342945000  |
| 16 | 1.381762000  | 1.968280000  | 0.000000000  |
| 6  | 0.179313000  | 4.123858000  | 0.688783000  |
| 6  | -0.199870000 | -1.088949000 | 2.962150000  |
| 6  | -0.117196000 | -0.667371000 | 4.342945000  |
| 1  | 0.251542000  | 1.303383000  | 5.200480000  |
| 6  | 0.640058000  | 2.918722000  | -1.270682000 |
| 1  | -0.280009000 | 4.902768000  | 1.278081000  |
| 6  | 0.179313000  | 4.123858000  | -0.688783000 |
| 7  | 0.000000000  | 0.000000000  | -2.153627000 |
| 16 | -1.381762000 | -1.968280000 | 0.000000000  |
| 17 | 2.235581000  | -1.313550000 | 0.000000000  |
| 6  | -0.393238000 | -2.450236000 | 2.574361000  |
| 6  | -0.199870000 | -1.088949000 | -2.962150000 |
| 6  | -0.640058000 | -2.918722000 | 1.270682000  |
| 17 | -2.235581000 | 1.313550000  | 0.000000000  |
| 6  | 0.199870000  | 1.088949000  | -2.962150000 |
| 6  | 0.117196000  | 0.667371000  | -4.342945000 |
| 6  | 0.393238000  | 2.450236000  | -2.574361000 |

|   |              |              |              |
|---|--------------|--------------|--------------|
| 1 | 0.251542000  | 1.303383000  | -5.200480000 |
| 6 | -0.117196000 | -0.667371000 | -4.342945000 |
| 6 | -0.393238000 | -2.450236000 | -2.574361000 |
| 6 | -0.179313000 | -4.123858000 | 0.688783000  |
| 6 | -0.179313000 | -4.123858000 | -0.688783000 |
| 1 | 0.280009000  | -4.902768000 | 1.278081000  |
| 6 | -0.640058000 | -2.918722000 | -1.270682000 |
| 1 | 0.280009000  | -4.902768000 | -1.278081000 |
| 1 | -0.251542000 | -1.303383000 | -5.200480000 |
| 1 | -0.251542000 | -1.303383000 | 5.200480000  |
| 1 | -0.280009000 | 4.902768000  | -1.278081000 |
| 6 | -0.176428000 | -3.502732000 | -3.601036000 |
| 6 | -1.144612000 | -4.490776000 | -3.813479000 |
| 6 | 1.000738000  | -3.560307000 | -4.356861000 |
| 6 | -0.950200000 | -5.485252000 | -4.761451000 |
| 1 | -2.066536000 | -4.463996000 | -3.246539000 |
| 6 | 1.194504000  | -4.566055000 | -5.292136000 |
| 1 | 1.776643000  | -2.823686000 | -4.194894000 |
| 6 | 0.223644000  | -5.545760000 | -5.515635000 |
| 1 | -1.725769000 | -6.225152000 | -4.919994000 |
| 1 | 2.119056000  | -4.592513000 | -5.856713000 |
| 6 | -0.176428000 | -3.502732000 | 3.601036000  |
| 6 | -1.144612000 | -4.490776000 | 3.813479000  |
| 6 | 1.000738000  | -3.560307000 | 4.356861000  |
| 6 | -0.950200000 | -5.485252000 | 4.761451000  |
| 1 | -2.066536000 | -4.463996000 | 3.246539000  |
| 6 | 1.194504000  | -4.566055000 | 5.292136000  |
| 1 | 1.776643000  | -2.823686000 | 4.194894000  |
| 6 | 0.223644000  | -5.545760000 | 5.515635000  |
| 1 | -1.725769000 | -6.225152000 | 4.919994000  |

|   |              |              |              |
|---|--------------|--------------|--------------|
| 1 | 2.119056000  | -4.592513000 | 5.856713000  |
| 6 | 0.176428000  | 3.502732000  | 3.601036000  |
| 6 | 1.144612000  | 4.490776000  | 3.813479000  |
| 6 | -1.000738000 | 3.560307000  | 4.356861000  |
| 6 | 0.950200000  | 5.485252000  | 4.761451000  |
| 1 | 2.066536000  | 4.463996000  | 3.246539000  |
| 6 | -1.194504000 | 4.566055000  | 5.292136000  |
| 1 | -1.776643000 | 2.823686000  | 4.194894000  |
| 6 | -0.223644000 | 5.545760000  | 5.515635000  |
| 1 | 1.725769000  | 6.225152000  | 4.919994000  |
| 1 | -2.119056000 | 4.592513000  | 5.856713000  |
| 6 | 0.176428000  | 3.502732000  | -3.601036000 |
| 6 | 1.144612000  | 4.490776000  | -3.813479000 |
| 6 | -1.000738000 | 3.560307000  | -4.356861000 |
| 6 | 0.950200000  | 5.485252000  | -4.761451000 |
| 1 | 2.066536000  | 4.463996000  | -3.246539000 |
| 6 | -1.194504000 | 4.566055000  | -5.292136000 |
| 1 | -1.776643000 | 2.823686000  | -4.194894000 |
| 6 | -0.223644000 | 5.545760000  | -5.515635000 |
| 1 | 1.725769000  | 6.225152000  | -4.919994000 |
| 1 | -2.119056000 | 4.592513000  | -5.856713000 |
| 6 | 0.449759000  | -6.646688000 | -6.515745000 |
| 1 | 0.986516000  | -7.482080000 | -6.056645000 |
| 1 | -0.494031000 | -7.035948000 | -6.898398000 |
| 1 | 1.048963000  | -6.300785000 | -7.358830000 |
| 6 | 0.449759000  | -6.646688000 | 6.515745000  |
| 1 | -0.494031000 | -7.035948000 | 6.898398000  |
| 1 | 0.986516000  | -7.482080000 | 6.056645000  |
| 1 | 1.048963000  | -6.300785000 | 7.358830000  |
| 6 | -0.449759000 | 6.646688000  | 6.515745000  |

|    |              |             |              |
|----|--------------|-------------|--------------|
| 1  | 0.494031000  | 7.035948000 | 6.898398000  |
| 1  | -0.986516000 | 7.482080000 | 6.056645000  |
| 1  | -1.048963000 | 6.300785000 | 7.358830000  |
| 6  | -0.449759000 | 6.646688000 | -6.515745000 |
| 1  | -0.986516000 | 7.482080000 | -6.056645000 |
| 1  | 0.494031000  | 7.035948000 | -6.898398000 |
| 1  | -1.048963000 | 6.300785000 | -7.358830000 |
| 25 | 0.000000000  | 0.000000000 | 0.000000000  |

### **Optimized structure of Acceptor A1**

|    |              |              |              |
|----|--------------|--------------|--------------|
| 6  | 2.386980000  | 0.324673000  | 0.024176000  |
| 7  | 0.873007000  | 1.982131000  | 0.064026000  |
| 6  | 0.156576000  | 0.802576000  | 0.034895000  |
| 6  | 1.073274000  | -0.233316000 | 0.009488000  |
| 7  | 2.587272000  | -1.889954000 | -0.032706000 |
| 6  | 3.303304000  | -0.710255000 | -0.003722000 |
| 6  | -1.282517000 | 0.788172000  | 0.029437000  |
| 6  | 4.743990000  | -0.694716000 | -0.003415000 |
| 6  | 2.271718000  | 1.781576000  | 0.066053000  |
| 8  | 3.075721000  | 2.692796000  | 0.099313000  |
| 6  | 1.188238000  | -1.689463000 | -0.033521000 |
| 8  | 0.384493000  | -2.601417000 | -0.066701000 |
| 16 | 5.670092000  | -2.201906000 | 0.032853000  |
| 6  | 7.131524000  | -1.268193000 | 0.010080000  |
| 6  | 6.797568000  | 0.118509000  | -0.021763000 |
| 7  | 5.456728000  | 0.392185000  | -0.028409000 |
| 6  | 8.441795000  | -1.714969000 | 0.021080000  |
| 6  | 9.442016000  | -0.745500000 | -0.001217000 |
| 6  | 9.111532000  | 0.640623000  | -0.033647000 |
| 6  | 7.803534000  | 1.088377000  | -0.044365000 |



|    |               |              |              |
|----|---------------|--------------|--------------|
| 7  | 10.798037000  | -1.017803000 | 0.005540000  |
| 6  | 11.483345000  | 0.074421000  | -0.019625000 |
| 16 | 10.583911000  | 1.569938000  | -0.054746000 |
| 16 | -2.209842000  | 2.294392000  | -0.012784000 |
| 6  | -3.670634000  | 1.360698000  | 0.001581000  |
| 6  | -3.335603000  | -0.025447000 | 0.036915000  |
| 7  | -1.997249000  | -0.299066000 | 0.051586000  |
| 6  | -4.981204000  | 1.807274000  | -0.019768000 |
| 6  | -5.984309000  | 0.838721000  | -0.004868000 |
| 6  | -5.649350000  | -0.548632000 | 0.031907000  |
| 6  | -4.344402000  | -0.995987000 | 0.053270000  |
| 7  | -7.329433000  | 1.111236000  | -0.024805000 |
| 6  | -8.044612000  | 0.025486000  | -0.005846000 |
| 16 | -7.117386000  | -1.481943000 | 0.041382000  |
| 1  | 0.479479000   | 2.909162000  | 0.104583000  |
| 1  | 2.980659000   | -2.816975000 | -0.074782000 |
| 1  | 8.699826000   | -2.764470000 | 0.045598000  |
| 1  | 7.544501000   | 2.137628000  | -0.068737000 |
| 1  | -5.238538000  | 2.856788000  | -0.047748000 |
| 1  | -4.085820000  | -2.045280000 | 0.080321000  |
| 1  | 12.564342000  | 0.103899000  | -0.019893000 |
| 6  | -9.489474000  | 0.022585000  | -0.022015000 |
| 6  | -11.898518000 | -0.558470000 | -0.041636000 |
| 6  | -11.684722000 | 0.793767000  | -0.059612000 |
| 1  | -12.838207000 | -1.086689000 | -0.044729000 |
| 1  | -12.483267000 | 1.521067000  | -0.080010000 |
| 16 | -10.429074000 | -1.436434000 | -0.011334000 |
| 6  | -10.313001000 | 1.127720000  | -0.048641000 |
| 1  | -9.928712000  | 2.136577000  | -0.059414000 |

## Optimized structure of Acceptor A2

|    |               |              |              |
|----|---------------|--------------|--------------|
| 6  | -2.412691000  | 0.430565000  | -0.018450000 |
| 7  | -0.966372000  | 2.145022000  | -0.110881000 |
| 6  | -0.203242000  | 0.996756000  | -0.038221000 |
| 6  | -1.078148000  | -0.073342000 | 0.021016000  |
| 7  | -2.524408000  | -1.787398000 | 0.114260000  |
| 6  | -3.287417000  | -0.639130000 | 0.041063000  |
| 6  | 1.234731000   | 1.038239000  | -0.028788000 |
| 6  | -4.726139000  | -0.680388000 | 0.031029000  |
| 6  | -2.355902000  | 1.888051000  | -0.112736000 |
| 8  | -3.195884000  | 2.764510000  | -0.183405000 |
| 6  | -1.134743000  | -1.530444000 | 0.115570000  |
| 8  | -0.294778000  | -2.407199000 | 0.186059000  |
| 16 | -5.595098000  | -2.221439000 | 0.014357000  |
| 6  | -7.090757000  | -1.343692000 | 0.014520000  |
| 6  | -6.808948000  | 0.054705000  | 0.023575000  |
| 7  | -5.481113000  | 0.379111000  | 0.032538000  |
| 6  | -8.383454000  | -1.839927000 | 0.005773000  |
| 6  | -9.421415000  | -0.909049000 | 0.007207000  |
| 6  | -9.141104000  | 0.489391000  | 0.016635000  |
| 6  | -7.853006000  | 0.986267000  | 0.024762000  |
| 7  | -10.757144000 | -1.230291000 | 0.000992000  |
| 6  | -11.514989000 | -0.177187000 | 0.005071000  |
| 16 | -10.642617000 | 1.364491000  | 0.016657000  |
| 16 | 2.104775000   | 2.578904000  | -0.010189000 |
| 6  | 3.600018000   | 1.700799000  | -0.013775000 |
| 6  | 3.317121000   | 0.302583000  | -0.024984000 |
| 7  | 1.990269000   | -0.021479000 | -0.032862000 |
| 6  | 4.892701000   | 2.196801000  | -0.005875000 |
| 6  | 5.932367000   | 1.266736000  | -0.010947000 |

|    |               |              |              |
|----|---------------|--------------|--------------|
| 6  | 5.649029000   | -0.132932000 | -0.022981000 |
| 6  | 4.361982000   | -0.629316000 | -0.029689000 |
| 7  | 7.265453000   | 1.589798000  | -0.005447000 |
| 6  | 8.021716000   | 0.530381000  | -0.014049000 |
| 16 | 7.150529000   | -1.011291000 | -0.030246000 |
| 1  | -0.610132000  | 3.084239000  | -0.193777000 |
| 1  | -2.880596000  | -2.726692000 | 0.196486000  |
| 1  | -8.600582000  | -2.898835000 | -0.001044000 |
| 1  | -7.634607000  | 2.044955000  | 0.032020000  |
| 1  | 5.109745000   | 3.255685000  | 0.002860000  |
| 1  | 4.143534000   | -1.687974000 | -0.038890000 |
| 6  | 9.462683000   | 0.580859000  | -0.012590000 |
| 6  | 11.917410000  | 0.085254000  | -0.006485000 |
| 6  | 11.624917000  | 1.433323000  | -0.031507000 |
| 1  | 12.385842000  | 2.198981000  | -0.069563000 |
| 16 | 10.453467000  | -0.842088000 | 0.021657000  |
| 6  | 10.247874000  | 1.714225000  | -0.036585000 |
| 1  | 9.828881000   | 2.708874000  | -0.066221000 |
| 6  | 13.231344000  | -0.559977000 | 0.004446000  |
| 6  | 13.405701000  | -1.878597000 | -0.439081000 |
| 6  | 14.357183000  | 0.140646000  | 0.462871000  |
| 6  | 14.659216000  | -2.474363000 | -0.425341000 |
| 1  | 12.558158000  | -2.437603000 | -0.815675000 |
| 6  | 15.609981000  | -0.455629000 | 0.468659000  |
| 1  | 14.247719000  | 1.151049000  | 0.833618000  |
| 6  | 15.768142000  | -1.765802000 | 0.026051000  |
| 1  | 14.770433000  | -3.492617000 | -0.775527000 |
| 1  | 16.464792000  | 0.102402000  | 0.829104000  |
| 1  | 16.745790000  | -2.230072000 | 0.034341000  |
| 6  | -12.979448000 | -0.219706000 | 0.000636000  |

|   |               |              |              |
|---|---------------|--------------|--------------|
| 6 | -13.634076000 | -1.459335000 | -0.016678000 |
| 6 | -13.747588000 | 0.950436000  | 0.013654000  |
| 6 | -15.018908000 | -1.520805000 | -0.020770000 |
| 1 | -13.044368000 | -2.364946000 | -0.026883000 |
| 6 | -15.133795000 | 0.884319000  | 0.009562000  |
| 1 | -13.266465000 | 1.920362000  | 0.027565000  |
| 6 | -15.774205000 | -0.350587000 | -0.007646000 |
| 1 | -15.512200000 | -2.484220000 | -0.034287000 |
| 1 | -15.713757000 | 1.797921000  | 0.019966000  |
| 1 | -16.855415000 | -0.401347000 | -0.010809000 |

### **Optimized structure of Acceptor A3**

|    |              |              |              |
|----|--------------|--------------|--------------|
| 6  | 2.373814000  | -0.295842000 | 0.030273000  |
| 7  | 0.991332000  | -2.067208000 | 0.054435000  |
| 6  | 0.189304000  | -0.945175000 | 0.053309000  |
| 6  | 1.023049000  | 0.159033000  | 0.043552000  |
| 7  | 2.404944000  | 1.927853000  | 0.114245000  |
| 6  | 3.207397000  | 0.806092000  | 0.069210000  |
| 6  | -1.247491000 | -1.035410000 | 0.072128000  |
| 6  | 4.644839000  | 0.894220000  | 0.081572000  |
| 6  | 2.371178000  | -1.759803000 | 0.033796000  |
| 8  | 3.243300000  | -2.604538000 | 0.022008000  |
| 6  | 1.024996000  | 1.620698000  | 0.093854000  |
| 8  | 0.152634000  | 2.466127000  | 0.115355000  |
| 16 | 5.457984000  | 2.442042000  | 0.344419000  |
| 6  | 6.982611000  | 1.627747000  | 0.192907000  |
| 6  | 6.747530000  | 0.234581000  | -0.039116000 |
| 7  | 5.431462000  | -0.127164000 | -0.094385000 |
| 6  | 8.252404000  | 2.159389000  | 0.274435000  |
| 6  | 9.322478000  | 1.270421000  | 0.118387000  |

|    |               |              |              |
|----|---------------|--------------|--------------|
| 6  | 9.088783000   | -0.120112000 | -0.113610000 |
| 6  | 7.815267000   | -0.651782000 | -0.194734000 |
| 7  | 10.635536000  | 1.629581000  | 0.170073000  |
| 6  | 11.427050000  | 0.601034000  | -0.007554000 |
| 16 | 10.609162000  | -0.938823000 | -0.261423000 |
| 16 | -2.061543000  | -2.592324000 | 0.270291000  |
| 6  | -3.585553000  | -1.772312000 | 0.164642000  |
| 6  | -3.351590000  | -0.373684000 | -0.006168000 |
| 7  | -2.036351000  | -0.008151000 | -0.053076000 |
| 6  | -4.858779000  | -2.308215000 | 0.229219000  |
| 6  | -5.928353000  | -1.418337000 | 0.118564000  |
| 6  | -5.694823000  | -0.019524000 | -0.051624000 |
| 6  | -4.424630000  | 0.516879000  | -0.115892000 |
| 7  | -7.248295000  | -1.783128000 | 0.160017000  |
| 6  | -8.035356000  | -0.754997000 | 0.033020000  |
| 16 | -7.223423000  | 0.800307000  | -0.155628000 |
| 1  | 0.669280000   | -3.021137000 | 0.002109000  |
| 1  | 2.726009000   | 2.883045000  | 0.084216000  |
| 1  | 8.439040000   | 3.209418000  | 0.449005000  |
| 1  | 7.628834000   | -1.701811000 | -0.369256000 |
| 1  | -5.041555000  | -3.365600000 | 0.357764000  |
| 1  | -4.241162000  | 1.574123000  | -0.244700000 |
| 6  | -9.476625000  | -0.872747000 | 0.043292000  |
| 6  | -11.936457000 | -0.510248000 | 0.006343000  |
| 6  | -11.571626000 | -1.847202000 | 0.135320000  |
| 1  | -12.304656000 | -2.637849000 | 0.210763000  |
| 16 | -10.519512000 | 0.494999000  | -0.088704000 |
| 6  | -10.193022000 | -2.052768000 | 0.156646000  |
| 1  | -9.714536000  | -3.015242000 | 0.249138000  |
| 6  | -13.285706000 | -0.073799000 | -0.035202000 |

|   |               |              |              |
|---|---------------|--------------|--------------|
| 1 | -14.008297000 | -0.878123000 | 0.042441000  |
| 6 | -13.812130000 | 1.182783000  | -0.155025000 |
| 6 | -13.033598000 | 2.368245000  | -0.268121000 |
| 7 | -12.411911000 | 3.335710000  | -0.360354000 |
| 6 | -15.226263000 | 1.359970000  | -0.171095000 |
| 7 | -16.369993000 | 1.508927000  | -0.184745000 |
| 6 | 12.847708000  | 0.803110000  | 0.018486000  |
| 1 | 13.124595000  | 1.836052000  | 0.188560000  |
| 6 | 13.859219000  | -0.091534000 | -0.134279000 |
| 6 | 15.214667000  | 0.354046000  | -0.066068000 |
| 7 | 16.310779000  | 0.705509000  | -0.012341000 |
| 6 | 13.681079000  | -1.487597000 | -0.363869000 |
| 7 | 13.561652000  | -2.618752000 | -0.549841000 |

#### **Optimized structure of Acceptor A4**

|    |              |              |              |
|----|--------------|--------------|--------------|
| 6  | 2.373814000  | -0.295842000 | 0.030273000  |
| 7  | 0.991332000  | -2.067208000 | 0.054435000  |
| 6  | 0.189304000  | -0.945175000 | 0.053309000  |
| 6  | 1.023049000  | 0.159033000  | 0.043552000  |
| 7  | 2.404944000  | 1.927853000  | 0.114245000  |
| 6  | 3.207397000  | 0.806092000  | 0.069210000  |
| 6  | -1.247491000 | -1.035410000 | 0.072128000  |
| 6  | 4.644839000  | 0.894220000  | 0.081572000  |
| 6  | 2.371178000  | -1.759803000 | 0.033796000  |
| 8  | 3.243300000  | -2.604538000 | 0.022008000  |
| 6  | 1.024996000  | 1.620698000  | 0.093854000  |
| 8  | 0.152634000  | 2.466127000  | 0.115355000  |
| 16 | 5.457984000  | 2.442042000  | 0.344419000  |
| 6  | 6.982611000  | 1.627747000  | 0.192907000  |
| 6  | 6.747530000  | 0.234581000  | -0.039116000 |

|    |               |              |              |
|----|---------------|--------------|--------------|
| 7  | 5.431462000   | -0.127164000 | -0.094385000 |
| 6  | 8.252404000   | 2.159389000  | 0.274435000  |
| 6  | 9.322478000   | 1.270421000  | 0.118387000  |
| 6  | 9.088783000   | -0.120112000 | -0.113610000 |
| 6  | 7.815267000   | -0.651782000 | -0.194734000 |
| 7  | 10.635536000  | 1.629581000  | 0.170073000  |
| 6  | 11.427050000  | 0.601034000  | -0.007554000 |
| 16 | 10.609162000  | -0.938823000 | -0.261423000 |
| 16 | -2.061543000  | -2.592324000 | 0.270291000  |
| 6  | -3.585553000  | -1.772312000 | 0.164642000  |
| 6  | -3.351590000  | -0.373684000 | -0.006168000 |
| 7  | -2.036351000  | -0.008151000 | -0.053076000 |
| 6  | -4.858779000  | -2.308215000 | 0.229219000  |
| 6  | -5.928353000  | -1.418337000 | 0.118564000  |
| 6  | -5.694823000  | -0.019524000 | -0.051624000 |
| 6  | -4.424630000  | 0.516879000  | -0.115892000 |
| 7  | -7.248295000  | -1.783128000 | 0.160017000  |
| 6  | -8.035356000  | -0.754997000 | 0.033020000  |
| 16 | -7.223423000  | 0.800307000  | -0.155628000 |
| 1  | 0.669280000   | -3.021137000 | 0.002109000  |
| 1  | 2.726009000   | 2.883045000  | 0.084216000  |
| 1  | 8.439040000   | 3.209418000  | 0.449005000  |
| 1  | 7.628834000   | -1.701811000 | -0.369256000 |
| 1  | -5.041555000  | -3.365600000 | 0.357764000  |
| 1  | -4.241162000  | 1.574123000  | -0.244700000 |
| 6  | -9.476625000  | -0.872747000 | 0.043292000  |
| 6  | -11.936457000 | -0.510248000 | 0.006343000  |
| 6  | -11.571626000 | -1.847202000 | 0.135320000  |
| 1  | -12.304656000 | -2.637849000 | 0.210763000  |
| 16 | -10.519512000 | 0.494999000  | -0.088704000 |



|   |               |              |              |
|---|---------------|--------------|--------------|
| 6 | -10.193022000 | -2.052768000 | 0.156646000  |
| 1 | -9.714536000  | -3.015242000 | 0.249138000  |
| 6 | -13.269260560 | -0.079118700 | -0.034695620 |
| 8 | -13.570828610 | 1.105160060  | -0.148042660 |
| 1 | -14.034366950 | -0.880259830 | 0.042120240  |
| 6 | 12.847708000  | 0.803110000  | 0.018486000  |
| 8 | 13.315919750  | 1.955973220  | 0.206248360  |
| 1 | 13.508756810  | -0.026497040 | -0.121751760 |

### **Optimized structure of Acceptor A5**

|    |              |              |              |
|----|--------------|--------------|--------------|
| 6  | 1.853620750  | -0.165675460 | 0.092189490  |
| 7  | 0.382833590  | -1.012502650 | 1.565025740  |
| 6  | -0.357942140 | -0.526876880 | 0.507846880  |
| 6  | 0.530586660  | 0.004650760  | -0.410029030 |
| 7  | 1.994078600  | 0.934396260  | -1.837306200 |
| 6  | 2.738493220  | 0.407978220  | -0.801430910 |
| 6  | -1.795323930 | -0.606013110 | 0.484449670  |
| 6  | 4.174247880  | 0.513818200  | -0.761866610 |
| 6  | 1.774863790  | -0.837082740 | 1.390731270  |
| 8  | 2.600740050  | -1.203765000 | 2.201771030  |
| 6  | 0.604805280  | 0.722704010  | -1.681992000 |
| 8  | -0.221947730 | 1.098310000  | -2.489226510 |
| 16 | 5.046343590  | 1.490670070  | -1.949829470 |
| 6  | 6.533542530  | 1.038748650  | -1.178774300 |
| 6  | 6.243219010  | 0.182306500  | -0.068716490 |
| 7  | 4.917174920  | -0.083051020 | 0.124004950  |
| 6  | 7.820471120  | 1.403913980  | -1.513637510 |
| 6  | 8.851267920  | 0.896405100  | -0.713908700 |
| 6  | 8.562459870  | 0.041251330  | 0.393936020  |
| 6  | 7.271792790  | -0.323709230 | 0.728718580  |

|    |               |              |              |
|----|---------------|--------------|--------------|
| 7  | 10.174427800  | 1.157280820  | -0.906211680 |
| 6  | 10.921971990  | 0.555815480  | -0.014375480 |
| 16 | 10.044941320  | -0.409584780 | 1.170263440  |
| 16 | -2.700766800  | -1.178283670 | 1.891080420  |
| 6  | -4.169219910  | -0.951744680 | 0.997484630  |
| 6  | -3.851789520  | -0.450043700 | -0.301595470 |
| 7  | -2.519288720  | -0.273578630 | -0.544432970 |
| 6  | -5.469922260  | -1.189442910 | 1.402626110  |
| 6  | -6.481677190  | -0.917996850 | 0.480246080  |
| 6  | -6.164711730  | -0.415675430 | -0.818747410 |
| 6  | -4.867026500  | -0.177587370 | -1.224427020 |
| 7  | -7.818446550  | -1.099134940 | 0.719566750  |
| 6  | -8.540449550  | -0.767820760 | -0.310767760 |
| 16 | -7.637861070  | -0.187934420 | -1.711788690 |
| 1  | 0.016171710   | -1.510529200 | 2.361244720  |
| 1  | 2.365534200   | 1.359938460  | -2.672357580 |
| 1  | 8.048729090   | 2.049500270  | -2.349690870 |
| 1  | 7.043733730   | -0.969245280 | 1.564809700  |
| 1  | -5.715737860  | -1.569482730 | 2.384022230  |
| 1  | -4.620510570  | 0.202180400  | -2.205764480 |
| 6  | -9.983122060  | -0.867380930 | -0.314039990 |
| 6  | -12.412363100 | -0.826030130 | -0.843777940 |
| 6  | -12.127150040 | -1.313803630 | 0.428194250  |
| 1  | -12.903643680 | -1.638826350 | 1.106106610  |
| 16 | -10.942039190 | -0.393702570 | -1.667506700 |
| 6  | -10.765858150 | -1.337538300 | 0.727497140  |
| 1  | -10.345474880 | -1.680854430 | 1.659844590  |
| 7  | -13.655757770 | -0.719217940 | -1.325443970 |
| 8  | -13.812494240 | -0.179838290 | -2.385124160 |
| 8  | -14.559224770 | -1.167524900 | -0.676462460 |

|   |              |              |              |
|---|--------------|--------------|--------------|
| 7 | 12.386880120 | 0.677507250  | -0.002744030 |
| 8 | 12.884539730 | 1.270649400  | -0.910163720 |
| 8 | 12.985620560 | -0.098091890 | 0.677578700  |

### **Optimized structure of Acceptor A6**

|    |              |              |              |
|----|--------------|--------------|--------------|
| 6  | 1.853620750  | -0.165675460 | 0.092189490  |
| 7  | 0.382833590  | -1.012502650 | 1.565025740  |
| 6  | -0.357942140 | -0.526876880 | 0.507846880  |
| 6  | 0.530586660  | 0.004650760  | -0.410029030 |
| 7  | 1.994078600  | 0.934396260  | -1.837306200 |
| 6  | 2.738493220  | 0.407978220  | -0.801430910 |
| 6  | -1.795323930 | -0.606013110 | 0.484449670  |
| 6  | 4.174247880  | 0.513818200  | -0.761866610 |
| 6  | 1.774863790  | -0.837082740 | 1.390731270  |
| 8  | 2.600740050  | -1.203765000 | 2.201771030  |
| 6  | 0.604805280  | 0.722704010  | -1.681992000 |
| 8  | -0.221947730 | 1.098310000  | -2.489226510 |
| 16 | 5.046343590  | 1.490670070  | -1.949829470 |
| 6  | 6.533542530  | 1.038748650  | -1.178774300 |
| 6  | 6.243219010  | 0.182306500  | -0.068716490 |
| 7  | 4.917174920  | -0.083051020 | 0.124004950  |
| 6  | 7.820471120  | 1.403913980  | -1.513637510 |
| 6  | 8.851267920  | 0.896405100  | -0.713908700 |
| 6  | 8.562459870  | 0.041251330  | 0.393936020  |
| 6  | 7.271792790  | -0.323709230 | 0.728718580  |
| 7  | 10.174427800 | 1.157280820  | -0.906211680 |
| 6  | 10.921971990 | 0.555815480  | -0.014375480 |
| 16 | 10.044941320 | -0.409584780 | 1.170263440  |
| 16 | -2.700766800 | -1.178283670 | 1.891080420  |
| 6  | -4.169219910 | -0.951744680 | 0.997484630  |

|    |               |              |              |
|----|---------------|--------------|--------------|
| 6  | -3.851789520  | -0.450043700 | -0.301595470 |
| 7  | -2.519288720  | -0.273578630 | -0.544432970 |
| 6  | -5.469922260  | -1.189442910 | 1.402626110  |
| 6  | -6.481677190  | -0.917996850 | 0.480246080  |
| 6  | -6.164711730  | -0.415675430 | -0.818747410 |
| 6  | -4.867026500  | -0.177587370 | -1.224427020 |
| 7  | -7.818446550  | -1.099134940 | 0.719566750  |
| 6  | -8.540449550  | -0.767820760 | -0.310767760 |
| 16 | -7.637861070  | -0.187934420 | -1.711788690 |
| 1  | 0.016171710   | -1.510529200 | 2.361244720  |
| 1  | 2.365534200   | 1.359938460  | -2.672357580 |
| 1  | 8.048729090   | 2.049500270  | -2.349690870 |
| 1  | 7.043733730   | -0.969245280 | 1.564809700  |
| 1  | -5.715737860  | -1.569482730 | 2.384022230  |
| 1  | -4.620510570  | 0.202180400  | -2.205764480 |
| 6  | -9.983122060  | -0.867380930 | -0.314039990 |
| 6  | -12.412363100 | -0.826030130 | -0.843777940 |
| 6  | -12.127150040 | -1.313803630 | 0.428194250  |
| 1  | -12.903643680 | -1.638826350 | 1.106106610  |
| 16 | -10.942039190 | -0.393702570 | -1.667506700 |
| 6  | -10.765858150 | -1.337538300 | 0.727497140  |
| 1  | -10.345474880 | -1.680854430 | 1.659844590  |
| 6  | 12.456637650  | 0.683302100  | -0.002190160 |
| 8  | 13.286557330  | 0.187326220  | 0.758600920  |
| 8  | 12.915427910  | 1.474877100  | -1.004353070 |
| 1  | 13.884043460  | 1.538191260  | -0.973757260 |
| 6  | -13.826812210 | -0.688652300 | -1.437125270 |
| 8  | -14.187025270 | -0.274414510 | -2.538131820 |
| 8  | -14.789398020 | -1.100891260 | -0.574050780 |
| 1  | -15.669849820 | -1.003856670 | -0.972233880 |

### Optimized structure of Acceptor A7

|    |              |              |              |
|----|--------------|--------------|--------------|
| 6  | 1.853620750  | -0.165675460 | 0.092189490  |
| 7  | 0.382833590  | -1.012502650 | 1.565025740  |
| 6  | -0.357942140 | -0.526876880 | 0.507846880  |
| 6  | 0.530586660  | 0.004650760  | -0.410029030 |
| 7  | 1.994078600  | 0.934396260  | -1.837306200 |
| 6  | 2.738493220  | 0.407978220  | -0.801430910 |
| 6  | -1.795323930 | -0.606013110 | 0.484449670  |
| 6  | 4.174247880  | 0.513818200  | -0.761866610 |
| 6  | 1.774863790  | -0.837082740 | 1.390731270  |
| 8  | 2.600740050  | -1.203765000 | 2.201771030  |
| 6  | 0.604805280  | 0.722704010  | -1.681992000 |
| 8  | -0.221947730 | 1.098310000  | -2.489226510 |
| 16 | 5.046343590  | 1.490670070  | -1.949829470 |
| 6  | 6.533542530  | 1.038748650  | -1.178774300 |
| 6  | 6.243219010  | 0.182306500  | -0.068716490 |
| 7  | 4.917174920  | -0.083051020 | 0.124004950  |
| 6  | 7.820471120  | 1.403913980  | -1.513637510 |
| 6  | 8.851267920  | 0.896405100  | -0.713908700 |
| 6  | 8.562459870  | 0.041251330  | 0.393936020  |
| 6  | 7.271792790  | -0.323709230 | 0.728718580  |
| 7  | 10.174427800 | 1.157280820  | -0.906211680 |
| 6  | 10.921971990 | 0.555815480  | -0.014375480 |
| 16 | 10.044941320 | -0.409584780 | 1.170263440  |
| 16 | -2.700766800 | -1.178283670 | 1.891080420  |
| 6  | -4.169219910 | -0.951744680 | 0.997484630  |
| 6  | -3.851789520 | -0.450043700 | -0.301595470 |
| 7  | -2.519288720 | -0.273578630 | -0.544432970 |
| 6  | -5.469922260 | -1.189442910 | 1.402626110  |

|    |               |              |              |
|----|---------------|--------------|--------------|
| 6  | -6.481677190  | -0.917996850 | 0.480246080  |
| 6  | -6.164711730  | -0.415675430 | -0.818747410 |
| 6  | -4.867026500  | -0.177587370 | -1.224427020 |
| 7  | -7.818446550  | -1.099134940 | 0.719566750  |
| 6  | -8.540449550  | -0.767820760 | -0.310767760 |
| 16 | -7.637861070  | -0.187934420 | -1.711788690 |
| 1  | 0.016171710   | -1.510529200 | 2.361244720  |
| 1  | 2.365534200   | 1.359938460  | -2.672357580 |
| 1  | 8.048729090   | 2.049500270  | -2.349690870 |
| 1  | 7.043733730   | -0.969245280 | 1.564809700  |
| 1  | -5.715737860  | -1.569482730 | 2.384022230  |
| 1  | -4.620510570  | 0.202180400  | -2.205764480 |
| 6  | -9.983122060  | -0.867380930 | -0.314039990 |
| 6  | -12.412363100 | -0.826030130 | -0.843777940 |
| 6  | -12.127150040 | -1.313803630 | 0.428194250  |
| 1  | -12.903643680 | -1.638826350 | 1.106106610  |
| 16 | -10.942039190 | -0.393702570 | -1.667506700 |
| 6  | -10.765858150 | -1.337538300 | 0.727497140  |
| 1  | -10.345474880 | -1.680854430 | 1.659844590  |
| 6  | -13.826812210 | -0.688652300 | -1.437125270 |
| 7  | -14.892241410 | -0.585172890 | -1.884062220 |
| 6  | 12.456637650  | 0.683302100  | -0.002190160 |
| 7  | 13.612619570  | 0.779330980  | 0.006988390  |
